# Supplementary material
Source: PubMed Central journal article supplement (PMC5466821)
Supplement: NIHMS860930-supplement-SI_Video_Captions.pdf [file NIHMS860930-supplement-SI_Video_Captions.pdf]

## Supporting Information (SI)

### **Acoustofluidic Transfer of Inflammatory Cells from Human Sputum Samples**

Sixing Li,<sup>†,‡</sup> Liqiang Ren,<sup>†</sup> Po-Hsun Huang,<sup>†</sup> Xianglan Yao,<sup>§</sup> Rosemarie A. Cuento,<sup>§</sup> J. Philip McCoy,<sup>§</sup> Craig E. Cameron,<sup>‡,||</sup> Stewart J. Levine,<sup>\*,§</sup> and Tony Jun Huang<sup>\*,†,‡</sup>

---

<sup>†</sup>*Department of Engineering Science and Mechanics, <sup>‡</sup>The Molecular, Cellular and Integrative Biosciences (MCIBS) Graduate Program, The Huck Institutes of the Life Sciences, and <sup>||</sup>Department of Biochemistry and Molecular Biology, The Pennsylvania State University, University Park, Pennsylvania 16802, United States*

<sup>§</sup>*National Heart, Lung, and Blood Institute (NHLBI), NIH, Bethesda, Maryland 20892, United States*

*\*To whom correspondence may be addressed. E-mail: levines@nhlbi.nih.gov, or junhuang@psu.edu*

#### **Video captions**

**Supplementary Video S1:** Video taken at the outlet region of the acoustofluidic cell transfer experiment when the SSAW was not applied. All of the inflammatory cells present in the liquefied sputum sample exited through the lower outlet.

**Supplementary Video S2:** Video taken at the outlet region of the acoustofluidic cell transfer experiment when the SSAW was applied. Most of the inflammatory cells were transferred and collected through the upper outlet.
